# Supplementary material
Source: ML conference proceedings conference paper supplement (https://proceedings.neurips.cc/paper_files/paper/2019/hash/a32d7eeaae19821fd9ce317f3ce952a7-Abstract.html)
Supplement: Supplementary file [file a32d7eeaae19821fd9ce317f3ce952a7-Supplemental.zip]

---

# Supplemental Materials for: Random Projections with Asymmetric Quantization

---

**Xiaoyun Li**

Department of Statistics  
Rutgers University  
Piscataway, NJ 08854  
xiaoyun.li@rutgers.edu

**Ping Li**

Cognitive Computing Lab  
Baidu Research USA  
Bellevue, WA 98004  
liping11@baidu.com

## A Proofs of Section 3: Scenario 1

Recall the notations in Section 3,

$$\gamma_{\alpha,\beta} = \mathbb{E} \left( Q_b(x)^\alpha y^\beta \right), \quad \xi_{\alpha,\beta} = \mathbb{E} \left( Q_b(x)^\alpha x^\beta \right). \quad (1)$$

Also denote  $\mathbf{x} = (x_1, \dots, x_k)$ ,  $\mathbf{y} = (y_1, \dots, y_k)$ , and  $Q_b(\mathbf{x}) = (Q_b(x_1), \dots, Q_b(x_k))$ , etc.

The following Lemma is a known result of Lloyd-Max quantizer. We provide a proof here since the proof would be useful for helping readers to better understand the details.

**Lemma A1.** *Let  $Q_b$  be a  $b$ -bit Lloyd-Max quantizer optimized with respect to an arbitrary probability distribution  $f$ . Suppose random variable  $x \sim f$ , then*

$$\xi_{1,1} = \xi_{2,0} = 1 - D_b.$$

Furthermore, if  $f$  is standard normal distribution, then  $\xi_{1,1} = \xi_{2,0} \leq 1$ .

*Proof.* Recall that each reconstruction level of LM quantizer is the conditional expectations on its corresponding separated region. Let  $t_0 < t_1 < \dots < t_M$  be the borders. We have

$$\begin{aligned} \mathbb{E}(Q_b(x)x) &= \sum_{i=1}^M \int_{t_{i-1}}^{t_i} \frac{\int_{t_{i-1}}^{t_i} x f(x) dx}{\int_{t_{i-1}}^{t_i} f(x) dx} x f(x) dx \\ &= \sum_{i=1}^M \frac{(\int_{t_{i-1}}^{t_i} x f(x) dx)^2}{\int_{t_{i-1}}^{t_i} f(x) dx} \\ &= \sum_{i=1}^M \int_{t_{i-1}}^{t_i} \frac{(\int_{t_{i-1}}^{t_i} x f(x) dx)^2}{(\int_{t_{i-1}}^{t_i} f(x) dx)^2} f(x) dx = \mathbb{E}(Q_b(x)^2). \end{aligned}$$

If  $f(x) = \phi(x)$  which is standar Gaussian density, we have

$$1 - D_b = 1 - \mathbb{E}((x - Q_b(x))^2) = 2\mathbb{E}(Q_b(x)x) - \mathbb{E}(Q_b(x)^2) = \xi_{1,1}.$$

The proof is complete. □

### A.1 Proof of Theorem 1

*Proof.* We have  $y_i = \rho x_i + \sqrt{1 - \rho^2} Z$  in distribution, with  $Z \sim N(0, 1)$  independent of  $x$ . Hence,

$$\begin{aligned} \mathbb{E}(\hat{\rho}_{b,f}) &= \gamma_{1,1} = \mathbb{E}(Q_b(x)(\rho x_i + \sqrt{1 - \rho^2} Z)) \\ &= \rho \mathbb{E}(Q_b(x)x_i) \\ &= \xi_{1,1} \rho. \end{aligned}$$

Moreover, we have

$$\begin{aligned}\gamma_{2,2} &= \mathbb{E}(Q_b(x)^2(\rho x_i + \sqrt{1-\rho^2}Z)^2) \\ &= \xi_{2,2}\rho^2 + (1-\rho^2)\xi_{2,0} \\ &= (\xi_{2,2} - \xi_{2,0})\rho^2 + \xi_{2,0}.\end{aligned}$$

Therefore, the variance can be expressed as

$$\begin{aligned}\text{Var}(\hat{\rho}_{b,f}) &= \frac{1}{k}\text{Var}(Q_b(x_i)y_i) = \frac{1}{k}(\mathbb{E}(Q_b(x_i)^2y_i^2) - \mathbb{E}(Q_b(x_i)y_i)^2) \\ &= \frac{1}{k}(\gamma_{2,2} - \xi_{1,1}^2\rho^2) \\ &= \frac{(\xi_{2,2} - \xi_{2,0} - \xi_{1,1}^2)\rho^2 + \xi_{2,0}}{k}.\end{aligned}$$

The variance of debiased estimator follows easily. The proof is complete.  $\square$

## A.2 Proof of Theorem 2

*Proof.* Using first order Taylor expansion of  $\frac{x}{y}$  at  $x_0, y_0$  we get

$$\frac{x}{y} = \frac{x_0}{y_0} + \frac{x - x_0}{y_0} - \frac{(y - y_0)x_0}{y_0^2} + O\left(\frac{(y - y_0)^2}{y_0^3}\right). \quad (2)$$

Therefore,

$$\mathbb{E}(\hat{\rho}_{b,f,n}) = \mathbb{E}\left(\frac{\frac{1}{k}\langle Q_b(\mathbf{x}), \mathbf{y} \rangle}{\sqrt{\frac{1}{k^2}\|Q_b(\mathbf{x})\|_2^2\|\mathbf{y}\|_2^2}}\right) = \frac{\mathbb{E}(\hat{\rho}_{b,f})}{\mathbb{E}\left(\sqrt{\frac{1}{k^2}\|Q_b(\mathbf{x})\|_2^2\|\mathbf{y}\|_2^2}\right)} + O\left(\frac{1}{k}\right).$$

Let  $T = \frac{1}{k^2}\|Q_b(\mathbf{x})\|_2^2\|\mathbf{y}\|_2^2$  and  $\mathbb{E}(T) = E_0$ . Using another Taylor expansion we have:

$$\begin{aligned}\mathbb{E}(\sqrt{T}) &= \mathbb{E}\left[\sqrt{E_0} + \frac{T - E_0}{2\sqrt{E_0}} + O((T - E_0)^2)\right] \\ &= \sqrt{E_0} + O\left(\frac{1}{k}\right), \text{ as } k \rightarrow \infty,\end{aligned}$$

and

$$\begin{aligned}E_0 = \mathbb{E}(T) &= \frac{1}{k^2}\mathbb{E}\left[\left(\sum_i^k Q_b(x_i)^2\right)\left(\sum_i^k y_i^2\right)\right] \\ &= \frac{1}{k^2}(\mathbb{E}[\sum_{i \neq j}^k Q_b(x_i)^2 y_j^2] + \mathbb{E}[\sum_{l=1}^k Q_b(x_l)^2 y_l^2]) \\ &= \frac{k(k-1)}{k^2}\mathbb{E}(Q(x_1)^2) + \frac{1}{k}\mathbb{E}(Q(x_1)^2 y_1^2) \\ &= \frac{k-1}{k}\xi_{2,0} + \frac{\gamma_{2,2}}{k} + O\left(\frac{1}{k}\right), \text{ as } k \rightarrow \infty.\end{aligned}$$

Put above parts together, we obtain the expected value as  $k \rightarrow \infty$ ,

$$\mathbb{E}(\hat{\rho}_{b,f,n}) = \frac{\xi_{1,1}\rho}{\sqrt{\xi_{2,0}}} + O\left(\frac{1}{k}\right).$$

To derive the asymptotic variance, let  $a = \frac{\langle Q_b(x), y \rangle}{k}$ ,  $b = \frac{\|Q_b(x)\|^2}{k}$ ,  $c = \frac{\|y\|^2}{k}$ , and hence  $\hat{\rho}_{b,f,n} = \frac{a}{\sqrt{b}\sqrt{c}}$ .

We have

$$\begin{aligned}
\mathbb{E}(a) &= \xi_{1,1}\rho = \xi_{2,0}\rho = \gamma_{2,0}\rho, \quad \text{Var}(a) = \frac{\gamma_{2,2} - \gamma_{2,0}^2\rho^2}{k}, \\
\mathbb{E}(b) &= \xi_{2,0} = \gamma_{2,0}, \quad \text{Var}(b) = \frac{\gamma_{4,0} - \gamma_{2,0}^2}{k}, \\
\mathbb{E}(c) &= 1, \quad \text{Var}(c) = \frac{2}{k}, \\
\text{Cov}(a, b) &= \mathbb{E} \left[ \frac{1}{k^2} \left( \sum_1^k Q_b(x_i) y_i \right) \left( \sum_1^k Q_b(x_i)^2 \right) \right] - \mathbb{E}(a)\mathbb{E}(b), \\
&= \frac{1}{k^2} [k(k-1)\gamma_{2,0} \cdot \gamma_{2,0}\rho + k\gamma_{3,1}] - \gamma_{2,0}^2\rho, \\
&= \frac{\gamma_{3,1} - \gamma_{2,0}^2\rho}{k}.
\end{aligned}$$

Similarly, we can get

$$\text{Cov}(a, c) = \frac{\gamma_{1,3} - \gamma_{2,0}\rho}{k}, \quad \text{Cov}(b, c) = \frac{\gamma_{2,2} - \gamma_{2,0}}{k}.$$

Hence the covariance matrix is formulated as

$$\text{Cov}(a, b, c) = \frac{1}{k} \begin{pmatrix} \gamma_{2,2} - \gamma_{2,0}^2\rho^2 & \gamma_{3,1} - \gamma_{2,0}^2\rho & \gamma_{1,3} - \gamma_{2,0}\rho \\ \gamma_{3,1} - \gamma_{2,0}^2\rho & \gamma_{4,0} - \gamma_{2,0}^2 & \gamma_{2,2} - \gamma_{2,0} \\ \gamma_{1,3} - \gamma_{2,0}\rho & \gamma_{2,2} - \gamma_{2,0} & 2 \end{pmatrix},$$

and the gradients

$$\nabla(a, b, c) = \left( \frac{1}{\sqrt{bc}}, -\frac{a}{2b^{\frac{3}{2}}\sqrt{c}}, -\frac{a}{2c^{\frac{3}{2}}\sqrt{b}} \right).$$

Second order Taylor expansion gives

$$\text{Var}(\hat{\rho}_{b,f,n}) = \nabla(\mathbb{E}(a), \mathbb{E}(b), \mathbb{E}(c))^T \text{Cov}(a, b, c) \nabla(\mathbb{E}(a), \mathbb{E}(b), \mathbb{E}(c)) + O\left(\frac{1}{k^2}\right),$$

and the final result is derived by plugging in the expressions and collecting terms:

$$\text{Var}(\hat{\rho}_{b,f,n}) = \frac{1}{k} \left[ \left( \frac{\gamma_{4,0}}{4\gamma_{2,0}} + \frac{3}{4}\gamma_{2,0} + \frac{1}{2}\gamma_{2,2} \right) \rho^2 - \left( \frac{\gamma_{3,1}}{\gamma_{2,0}} + \gamma_{1,3} \right) \rho + \frac{\gamma_{2,2}}{\gamma_{2,0}} \right] + O\left(\frac{1}{k^2}\right).$$

This concludes the proof.  $\square$

### A.3 Proof of Theorem 3

*Proof.* By normality assumption, we can compute,

$$\begin{aligned}
\hat{P}_{\mathcal{M}}(u_1, u_2, u_3) &= 1 - \Phi\left(\frac{\alpha(\rho_{12} - \rho_{13})}{\sqrt{\sigma_{\rho_{12}}^2 + \sigma_{\rho_{13}}^2 - 2C\sigma_{\rho_{12}}\sigma_{\rho_{13}}}}\right), \\
\hat{P}'_{\mathcal{M}}(u_1, u_2, u_3) &= 1 - \Phi\left(\frac{\alpha'(\rho_{12} - \rho_{13})}{\sqrt{\sigma_{\rho_{12}}'^2 + \sigma_{\rho_{13}}'^2 - 2C'\sigma_{\rho_{12}}'\sigma_{\rho_{13}}'}}\right).
\end{aligned}$$

We can rewrite in terms of debiased variances by  $\sigma_{\rho}^2 = \delta_{\rho}^2\alpha^2$  and  $\sigma_{\rho}'^2 = \delta_{\rho}'^2\alpha'^2$  for  $\forall \rho$ :

$$\begin{aligned}
\hat{P}_{\mathcal{M}}(u_1, u_2, u_3) &= 1 - \Phi\left(\frac{\rho_{12} - \rho_{13}}{\sqrt{\delta_{\rho_{12}}^2 + \delta_{\rho_{13}}^2 - 2C\delta_{\rho_{12}}\delta_{\rho_{13}}}}\right), \\
\hat{P}'_{\mathcal{M}}(u_1, u_2, u_3) &= 1 - \Phi\left(\frac{\rho_{12} - \rho_{13}}{\sqrt{\delta_{\rho_{12}}'^2 + \delta_{\rho_{13}}'^2 - 2C'\delta_{\rho_{12}}'\delta_{\rho_{13}}'}}\right) \\
&= 1 - \Phi\left(\frac{\rho_{12} - \rho_{13}}{\sqrt{a^2\delta_{\rho_{12}}^2 + a'^2\delta_{\rho_{13}}^2 - 2aa'C'\delta_{\rho_{12}}\delta_{\rho_{13}}}}\right),
\end{aligned}$$

with  $0 < a < 1$ ,  $0 < a' < 1$  by assumption. To compare the probabilities it suffices to consider the denominators. To make  $\hat{P}'_{\mathcal{M}}(u_1, u_2, u_3) < \hat{P}_{\mathcal{M}}(u_1, u_2, u_3)$ , we need

$$\delta_{\rho_{12}}^2 + \delta_{\rho_{13}}^2 - 2C\delta_{\rho_{12}}\delta_{\rho_{13}} > a^2\delta_{\rho_{12}}^2 + a'^2\delta_{\rho_{13}}^2 - 2aa'C'\delta_{\rho_{12}}\delta_{\rho_{13}},$$

which after some simplification gives the condition

$$C - aa'C' < \frac{(1 - a^2)\delta_{\rho_{12}}^2 + (1 - a'^2)\delta_{\rho_{13}}^2}{2\delta_{\rho_{12}}\delta_{\rho_{13}}}.$$

The proof is complete.  $\square$

## B Proofs of Section 4: Scenario 2 & Symmetric quantization

**Hermite polynomials.** First we introduce an important tool for our following analysis. The probabilists' Hermite polynomials are defined as

$$H_l(x) = (-1)^l \exp\left(\frac{x^2}{2}\right) \frac{d^l}{dx^l} \exp\left(-\frac{x^2}{2}\right),$$

which form an orthogonal basis of the Hilbert space  $\mathcal{H}$  of all functions satisfying  $\int |f(x)|^2 e^{-\frac{x^2}{2}} dx < \infty$ , w.r.t the  $e^{-\frac{x^2}{2}}$  measure. The inner product is well-defined as

$$\langle f, g \rangle = \int f(x)g(x)e^{-\frac{x^2}{2}} dx.$$

As an example, the first several Hermite polynomials are

$$H_0(x) = 1, H_1(x) = x, H_2(x) = x^2 - 1, H_3(x) = x^3 - 3x, \dots,$$

and they can be derived via a recursion relationship: for  $l = 0, 1, \dots$ ,

$$H_{l+1}(x) = xH_l(x) - H'_l(x).$$

Hermite Polynomials admits **Orthogonality** in the sense that

$$\begin{aligned} \int H_m(x)H_n(x)e^{-\frac{x^2}{2}} dx &= 0, \quad m \neq n, \\ \int H_n(x)H_n(x)e^{-\frac{x^2}{2}} dx &= \sqrt{2\pi}n!, \quad m = n. \end{aligned}$$

We can deduct some useful quantities from this property. Let  $x \sim N(0, 1)$ , then we have for all  $l = 1, 2, \dots$ ,

$$\mathbb{E}(H_l(x)) = \mathbb{E}(H_0(x)H_l(x)) = 0, \quad \text{Var}(H_l(x)) = \frac{1}{\sqrt{2\pi}} \int H_l(x)H_l(x)e^{-\frac{x^2}{2}} dx = l!.$$

Moreover,  $H_n(x)$  is an odd function if  $n$  is odd, and is symmetric about  $y$  axis when  $n$  is even. One important application of Hermite polynomials is that we can decompose the bivariate normal density as below [1]:

$$\phi_\rho(x, y) = \sum_{l=0}^{\infty} \frac{\rho^l}{l!} H_l(x)H_l(y)\phi(x)\phi(y),$$

where  $H_l(x)$  is the  $l$ -th order probabilist Hermite polynomial, and  $\phi(x)$  is the density function of standard normal distribution as defined before. This immediately implies that for any functions  $f_1$  and  $f_2$ , we can write

$$\begin{aligned} \mathbb{E}[f_1(x)f_2(y)] &= \int \int f_1(x)f_2(y)\phi_\rho(x, y)dx dy \\ &= \int \int f_1(x)f_2(y) \sum_{l=0}^{\infty} \frac{\rho^l}{l!} H_l(x)H_l(y)\phi(x)\phi(y)dx dy \\ &= \sum_{l=0}^{\infty} \frac{\rho^l}{l!} \int \int f_1(x)f_2(y)H_l(x)H_l(y)\phi(x)\phi(y)dx dy \\ &= \sum_{l=0}^{\infty} \frac{\rho^l}{l!} \left( \int f_1(x)H_l(x)\phi(x)dx \int f_2(y)H_l(y)\phi(y)dy \right). \end{aligned} \tag{3}$$

As we can see, the correlation coefficient  $\rho$  is factored out in (3), which is beneficial for studying the dependence of the expected value on  $\rho$ .

Now we recall some notations. The data vectors are LM quantized with different bits  $b_1 < b_2$ , and we denote two Lloyd-Max quantizers as  $Q_{b_1}$  and  $Q_{b_2}$  and distortion  $D_{b_1}$  and  $D_{b_2}$ , respectively. With a little abuse of notation, in this section we re-define  $\xi_{\alpha,\beta} = \mathbb{E}(Q_{b_1}(x)^\alpha x^\beta)$ ,  $\gamma_{\alpha,\beta} = \mathbb{E}(Q_{b_2}(x)^\alpha x^\beta)$  and  $\zeta_{\alpha,\beta} = \mathbb{E}(Q_{b_1}(x)^\alpha Q_{b_2}(y)^\beta)$ .

### B.1 Proof of Theorem 4 & Corollary 1

To prove the results, we will use the following lemma.

**Lemma B2.** Suppose we have a sequence of positive constants  $\mathbf{V} = (v_1, v_2, \dots)$ . Let  $\mathbf{W} = \text{diag}(\mathbf{V})$  and  $\mathbf{c}_1 = (c_{11}, c_{12}, \dots)$  and  $\mathbf{c}_2 = (c_{21}, c_{22}, \dots)$  be vectors with same length as  $\mathbf{V}$ . Then

$$\max_{\|\mathbf{c}_1\|_2^2=L_1, \|\mathbf{c}_2\|_2^2=L_2} \mathbf{c}_1^T \mathbf{W} \mathbf{c}_2 = \sqrt{L_1 L_2} \|\mathbf{V}\|_\infty,$$

where the infinite norm  $\|\cdot\|_\infty$  is the maximum absolute value of a vector.

*Proof.* By the symmetry of this optimization problem, we know that the optimal solution of  $\mathbf{c}_1$  and  $\mathbf{c}_2$  is not unique. Hence, we may cast two more constraints  $\mathbf{c}_1 \geq 0$  and  $\mathbf{c}_2 \geq 0$  to get a unique solution. To proceed, we introduce Lagrangian multipliers  $L$  with slack variables  $\tilde{\mathbf{s}} = (s_1, s_2, \dots)$ ,  $\tilde{\mathbf{t}} = (t_1, t_2, \dots)$  as:

$$L = \mathbf{c}_1^T \mathbf{W} \mathbf{c}_2 - \lambda_1 (\mathbf{c}_1^T \mathbf{c}_1 - L_1) - \lambda_2 (\mathbf{c}_2^T \mathbf{c}_2 - L_2) + \tilde{\lambda}_3^T (\mathbf{c}_1 - \tilde{\mathbf{s}}^2) - \tilde{\lambda}_4^T (\mathbf{c}_2 + \tilde{\mathbf{t}}^2),$$

where  $\tilde{\lambda}_3 = (\lambda_{31}, \lambda_{32}, \dots)$  and  $\tilde{\lambda}_4 = (\lambda_{41}, \lambda_{42}, \dots)$ . The Karush-Kuhn-Tucker conditions are satisfied at minimal point, which gives

$$\begin{cases} W \mathbf{c}_2 - 2\lambda_1 \mathbf{c}_1 + \tilde{\lambda}_3 = 0 & (4) \\ \mathbf{W} \mathbf{c}_1 - 2\lambda_2 \mathbf{c}_2 - \tilde{\lambda}_4 = 0 & (5) \\ \mathbf{c}_1^T \mathbf{c}_1 = L_1 \\ \mathbf{c}_2^T \mathbf{c}_2 = L_2 \\ \mathbf{c}_1 - \tilde{\mathbf{s}}^2 = 0 \\ \mathbf{c}_2 + \tilde{\mathbf{t}}^2 = 0 \\ 2\tilde{\lambda}_3 \odot \tilde{\mathbf{s}} = 0 \\ 2\tilde{\lambda}_4 \odot \tilde{\mathbf{t}} = 0 \end{cases}$$

where  $\odot$  denotes element-wise product. The equations leads to following observations:

- Any pair of values  $(c_{1i}, c_{2i})$  must be zero or nonzero at the same time. To see this, suppose  $c_{1i} = 0$  and  $c_{2i} \neq 0$ , then by (5) we have two situations:  
1)  $\lambda_2 \neq 0$  and  $\lambda_{4i} \neq 0$ , which implies that  $t_i = 0$  and thus  $c_{2i} = 0$ . A contradiction occurs.  
2)  $\lambda_2 = 0$  and  $\lambda_{4i} = 0$ . Firstly, we note that there must exist at least one  $j \neq i$  such that  $c_{1j} \neq 0$ . For a nonzero  $c_{1j}$ ,  $\lambda_2 = 0$  forces  $\lambda_{4j} \neq 0$ , and thus  $c_{2j}$  must be zero. Therefore, for  $\forall i = 1, 2, \dots$ , we have  $\mathbb{1}\{c_{1i} > 0\} + \mathbb{1}\{c_{2i} > 0\} \leq 1$ , which implies that the objective function is trivially 0. Hence it can not be an optimal solution.
- If  $c_{1i} \neq 0, c_{2i} \neq 0$  for a  $i \in$ , then  $\lambda_{3i} = \lambda_{4i} = 0$  for  $\forall i$ . From (4) and (5) we deduct that  $c_{1i} = \frac{\lambda_2 c_{2i}}{V_i} = \frac{V_i c_{2i}}{\lambda_1}$ , from which we can further derive  $V_i^2 = \lambda_1 \lambda_2$ .

Based on above reasoning, we can consider 2 situations for the optimal solution. First, if only one pair  $(c_{1i}, c_{2i})$  is nonzero, then the maximum of  $\mathbf{c}_1^T \mathbf{W} \mathbf{c}_2$  is trivially derived at

$$\mathbf{c}_1 = \sqrt{L_1} \mathbf{I}_{max}, \mathbf{c}_2 = \sqrt{L_2} \mathbf{I}_{max},$$

with  $\mathbf{I}_{max}$  the indicator vector of where the maximum of  $\mathbf{V}$  is located, e.g in the form  $(..., 0, 0, 1, 0, ...)$ . The maxima in this case equals to

$$\max_{\mathbf{c}_1, \mathbf{c}_2} \mathbf{c}_1^T \mathbf{W} \mathbf{c}_2 = \sqrt{L_1 L_2} \max \mathbf{V} = \sqrt{L_1 L_2} \|\mathbf{V}\|_\infty,$$

subject to constraints  $\|\mathbf{c}_1\|_2^2 = L_1, \|\mathbf{c}_2\|_2^2 = L_2$ .

Now consider the case where more than two pairs of values  $(c_{1i}, c_{2i}), i \in \mathcal{S}$  are nonzero, where  $\mathcal{S}$  denotes the set of nonzero indices. Then  $\lambda_1 \lambda_2 = V_i^2 := V^{*2}, \forall i \in \mathcal{S}$  must hold. By Cauchy-Schwartz inequality, we have

$$\mathbf{c}_1^T \mathbf{W} \mathbf{c}_2 = V^* \mathbf{c}_1^T \mathbf{c}_2 \leq V^* \|\mathbf{c}_1\|_2 \|\mathbf{c}_2\|_2 \leq \sqrt{L_1 L_2} V^* \leq \sqrt{L_1 L_2} \|\mathbf{V}\|_\infty,$$

and the bound is tight (i.e. equality holds when  $\mathbf{c}_1$  and  $\mathbf{c}_2$  have same direction).

Combining above analysis, we have shown that

$$\max_{\|\mathbf{c}_1\|_2^2=L_1, \|\mathbf{c}_2\|_2^2=L_2} \mathbf{c}_1^T \mathbf{W} \mathbf{c}_2 = \sqrt{L_1 L_2} \|\mathbf{V}\|_\infty.$$

□

#### Proof of Theorem 4 and Theorem 5.

*Proof.* First, we have that

$$\begin{aligned} & \mathbb{E}(Q_{b_1}(x)Q_{b_2}(y)) \\ &= \sum_{l=0}^{\infty} \frac{\rho^l}{l!} \left( \int Q_{b_1}(x)H_l(x)\phi(x)dx \int Q_{b_2}(y)H_l(y)\phi(y)dy \right) \\ &= \sum_{l=1, \text{odd}}^{\infty} \frac{\rho^l}{l!} E[Q_{b_1}(x)H_l(x)]E[Q_{b_2}(x)H_l(x)] \\ &= (1 - D_{b_1} - D_{b_2} + D_{b_1}D_{b_2})\rho + \sum_{l=3, \text{odd}}^{\infty} \frac{\rho^l}{l!} Cov[Q_{b_1}(x), H_l(x)] \cdot Cov[Q_{b_2}(x), H_l(x)]. \end{aligned} \quad (6)$$

Note that  $E_{-\rho}[Q_{b_1}(x)Q_{b_2}(y)] = -E_\rho[Q_{b_1}(x)Q_{b_2}(y)]$ , so it suffices to consider the case where  $\rho \geq 0$  in the remaining part of the proof.

From previous sections we know that for a fixed quantizer  $Q_b(\cdot)$  with distortion  $D_b$  and Hermite Polynomial  $H_k(\cdot)$  with  $k > 1$ ,

$$Var(H_k(x)) = \mathbb{E}(H_k(x)^2) = k!, \quad Cov(Q_b(x), x) = \mathbb{E}(Q_b(x)x) = 1 - D_b,$$

$$Var(Q_b(x)) = \mathbb{E}(Q_b(x)^2) = 1 - D_b, \quad Cov(H_k(x), x) = \mathbb{E}(H_k(x)x) = 0.$$

We can compute the correlations:

$$Corr(Q_b(x), x) = \sqrt{1 - D_b}, \quad Corr(H_k(x), x) = 0.$$

By working with correlations between 3 random variables and using Cauchy-Schwartz inequality, we get

$$-\sqrt{D_b} \leq Corr(Q_b(x), H_k(x)) \leq \sqrt{D_b}.$$

Denote the correlation  $Corr(Q_b(x), H_k(x))$  as  $c_k, k = 0, 1, 2, \dots$ , and  $\mathbf{C} = (c_0, c_1, c_2, \dots)$ . Note that Hermite polynomials are infinite orthogonal basis of the function space  $\mathcal{H}$ , and thus we have the decomposition  $Q_b(x) = \sum_{i=1}^{\infty} a_i H_i(x)$  for some  $a_i, i = 1, 2, \dots$ . Simple calculation yields  $Cov(Q, H_i) = a_i Var(H_i(x)), Var(Q) = \sum_{i=1}^{\infty} a_i^2 Var(H_i(x))$ . So the correlations can be derived as

$$c_i = Corr(Q, H_i) = \frac{a_i Var(H_i(x))}{\sqrt{\sum_{j=1}^{\infty} a_j^2 Var(H_j(x))} \sqrt{Var(H_i(x))}} = \frac{\sqrt{a_i Var(H_i(x))}}{\sqrt{\sum_{j=1}^{\infty} a_j^2 Var(H_j(x))}}.$$

Consequently, we have  $\mathbf{C}^T \mathbf{C} \equiv 1$ . Given that  $c_1 = \text{Corr}(Q_b(x), x) = \sqrt{1 - D_b}$  and  $c_k = 0$  for all even  $k$ 's, we have  $\sum_{k=3, \text{odd}}^{\infty} c_k^2 = D_b$ .

The above argument holds for both  $Q_{b_1}$  and  $Q_{b_2}$ . Denote  $c_{1k} = \text{Corr}(Q_{b_1}, H_k)$  and  $c_{2k} = \text{Corr}(Q_{b_2}, H_k)$  and notice that for  $i = 1, 2$  and  $k = 0, 1, 2, \dots$ ,

$$\text{Cov}(Q_{b_i}(x), H_k(x)) = c_{ik} \sqrt{1 - D_i} \sqrt{k!},$$

because  $\text{Var}[H_k(x)] = k!$ . Continuing with (7) we obtain

$$\mathbb{E}(\hat{\rho}_{b_1, b_2}) = E(Q_{b_1}(x)Q_{b_2}(y)) = (1 - D_{b_1})(1 - D_{b_2})\rho + \sqrt{1 - D_{b_1}}\sqrt{1 - D_{b_2}} \sum_{k=3, \text{odd}}^{\infty} c_{1k}c_{2k}\rho^k. \quad (8)$$

Now we seek to bound the last term in above equation. Applying Lemma B2 with  $\mathbf{V}(\rho) = (\rho^3, \rho^5, \rho^7, \dots)$  and constraints  $\|c_1\|_2^2 = D_{b_1}$ ,  $\|c_2\|_2^2 = D_{b_2}$ , we get

$$-\sqrt{D_{b_1}D_{b_2}}|\rho|^3 \leq \sum_{k=3, \text{odd}}^{\infty} c_{1k}c_{2k}\rho^k \leq \sqrt{D_{b_1}D_{b_2}}|\rho|^3,$$

for  $\rho \in [-1, 1]$  by symmetry, and this bound is tight in worst-case. Therefore, we have

$$|\mathbb{E}(\hat{\rho}_{b_1, b_2}) - (1 - D_{b_1})(1 - D_{b_2})\rho| \leq \sqrt{D_{b_1}D_{b_2}}\sqrt{1 - D_{b_1}}\sqrt{1 - D_{b_2}}|\rho|^3. \quad (9)$$

To get the bound on absolute bias, note that for  $\rho > 0$ , by Eq.(9) we have

$$\rho - \mathbb{E}(\hat{\rho}_{b_1, b_2}) \geq (D_{b_1} + D_{b_2} - D_{b_1}D_{b_2})\rho - \sqrt{D_{b_1}D_{b_2}}\sqrt{1 - D_{b_1}}\sqrt{1 - D_{b_2}}\rho^3. \quad (10)$$

By computing

$$\begin{aligned} & (D_{b_1} + D_{b_2} - D_{b_1}D_{b_2})^2 - D_{b_1}D_{b_2}(1 - D_{b_1})(1 - D_{b_2}) \\ &= D_{b_1}^2 + D_{b_2}^2 + D_{b_1}D_{b_2}(1 - D_{b_1} - D_{b_2}) \\ &\geq 0, \end{aligned}$$

since for LM quantizers,  $1 - D_{b_1} - D_{b_2} > 0$  always holds. Consequently, we know that  $\rho - \mathbb{E}(\hat{\rho}_{b_1, b_2}) > 0$  for  $\rho > 0$ . Now by the symmetry of  $\hat{\rho}_{b_1, b_2}$  and elementary inequalities, we have for  $\rho \in [-1, 1]$ ,

$$\Delta_2 - \Delta_1 \leq |E(\hat{\rho}_{b_1, b_2}) - \rho| \leq \Delta_1 + \Delta_2,$$

where

$$\Delta_1 = \sqrt{D_{b_1}D_{b_2}}\sqrt{1 - D_{b_1}}\sqrt{1 - D_{b_2}}|\rho|^3, \quad \Delta_2 = (D_{b_1} + D_{b_2} - D_{b_1}D_{b_2})|\rho|.$$

To prove Theorem 5, notice that when  $Q_1 = Q_2 := Q_b$  and  $D_{b_1} = D_{b_2} := D_b$ , we can modify (8) as

$$\mathbb{E}(Q_b(x)Q_b(y)) = (1 - 2D_b + D_b^2)\rho + (1 - D_b) \sum_{l=3, \text{odd}}^{\infty} c_l^2 \rho^l,$$

where  $c_k = \text{Corr}(Q_b(x), H_k(x))$  and  $\sum_{k=3}^{\infty} c_k^2 = D_b$ . Obviously, the summation is lower bounded by 0 and upper bounded by  $D_b\rho^3$ . Similar calculation can be conducted to get the bound on absolute bias. This completes the proof.  $\square$

## B.2 Proof of Theorem 6

*Proof.* The proof follows from the proof of Theorem 2. As  $k \rightarrow \infty$ , Taylor Expansion of  $\frac{x}{y}$  at  $x_0, y_0$  gives:

$$\frac{x}{y} = \frac{x_0}{y_0} + \frac{x - x_0}{y_0} - \frac{(y - y_0)x_0}{y_0^2} + O((x - x_0)^2) + O((y - y_0)^2).$$

We apply the expansion at expectations:

$$\mathbb{E}(\hat{\rho}_{b_1, b_2, n}) = \frac{\mathbb{E}(\frac{1}{k} \langle Q_{b_1}(\mathbf{x}), Q_{b_2}(\mathbf{y}) \rangle)}{\mathbb{E}\left(\sqrt{\frac{1}{k^2} \|Q_{b_1}(\mathbf{x})\|_2^2 \|Q_{b_2}(\mathbf{y})\|_2^2}\right)} + O\left(\frac{1}{k}\right) = \frac{\mathbb{E}(\hat{\rho}_{b_1, b_2})}{\mathbb{E}(\sqrt{T})} + O\left(\frac{1}{k}\right).$$

Let  $T = \frac{1}{k^2} \|Q_{b_1}(\mathbf{x})\|_2^2 \|Q_{b_2}(\mathbf{y})\|_2^2$ ,  $\mathbb{E}(T) = E_0$ . Using Taylor Expansion again, we have:

$$\begin{aligned}\mathbb{E}(\sqrt{T}) &= \mathbb{E}\left(\sqrt{E_0} + \frac{T - E_0}{2\sqrt{E_0}} + O((T - E_0)^2)\right) \\ &= \sqrt{E_0} + O\left(\frac{1}{k}\right), \text{ as } k \rightarrow \infty, \\ E_0 = \mathbb{E}(T) &= \frac{1}{k^2} \mathbb{E}\left(\left(\sum_i^k Q_{b_1}(x_i)^2\right)\left(\sum_i^k Q_{b_2}(y_i)^2\right)\right) \\ &= \frac{1}{k^2} \left[ \mathbb{E}\left(\sum_{i \neq j}^k Q_{b_1}(x_i)^2 Q_{b_2}(y_j)^2\right) + \mathbb{E}\left(\sum_{l=1}^k Q_{b_1}(x_l)^2 Q_{b_2}(y_l)^2\right) \right] \\ &= \frac{k(k-1)}{k^2} \mathbb{E}[Q_{b_1}(x_1)^2] \mathbb{E}[Q_{b_2}(y_1)^2] + \frac{1}{k} \mathbb{E}[Q_{b_1}(x_1)^2 Q_{b_2}(y_1)^2] \\ &= \frac{k-1}{k} \xi_{2,0} \gamma_{2,0} + \frac{1}{k} \zeta_{2,2} + O\left(\frac{1}{k}\right), \text{ as } k \rightarrow \infty.\end{aligned}$$

Combining parts together we have as  $k \rightarrow \infty$ ,

$$\mathbb{E}(\hat{\rho}_{b_1, b_2, n}) = \frac{\zeta_{1,1}}{\sqrt{\xi_{2,0} \gamma_{2,0}}} + O\left(\frac{1}{k}\right).$$

Let  $a = \frac{\langle Q_{b_1}(x), Q_{b_2}(y) \rangle}{k}$ ,  $b = \frac{\|Q_{b_1}(x)\|^2}{k}$ ,  $c = \frac{\|Q_{b_2}(y)\|^2}{k}$ , and thus  $\hat{\rho}_{b_1, b_2, n} = \frac{a}{\sqrt{b}\sqrt{c}}$ . We have:

$$\begin{aligned}\mathbb{E}(a) &= \zeta_{1,1}, \text{Var}(a) = \frac{\zeta_{2,2} - \zeta_{1,1}^2}{k}, \\ \mathbb{E}(b) &= \xi_{2,0}, \text{Var}(b) = \frac{\xi_{4,0} - \xi_{2,0}^2}{k}, \\ \mathbb{E}(c) &= \gamma_{2,0}, \text{Var}(c) = \frac{\gamma_{4,0} - \gamma_{2,0}^2}{k}, \\ \text{Cov}(a, b) &= \mathbb{E}\left(\frac{1}{k^2} \left(\sum_1^k Q_{b_1}(x_i) Q_{b_2}(y_i)\right) \left(\sum_1^k Q_{b_1}(x_i)^2\right)\right) - \mathbb{E}(a)\mathbb{E}(b) \\ &= \frac{1}{k^2} [k(k-1)\zeta_{1,1}\xi_{2,0} + k\zeta_{3,1}] - \zeta_{1,1}\xi_{2,0} \\ &= \frac{\zeta_{3,1} - \zeta_{1,1}\xi_{2,0}}{k}, \\ \text{Cov}(a, c) &= \frac{\zeta_{1,3} - \zeta_{1,1}\gamma_{2,0}}{k}, \text{Cov}(b, c) = \frac{\zeta_{2,2} - \xi_{2,0}\gamma_{2,0}}{k}.\end{aligned}$$

Therefore,

$$\text{Cov}(a, b, c) = \frac{1}{k} \begin{pmatrix} \zeta_{2,2} - \zeta_{1,1}^2 & \zeta_{3,1} - \zeta_{1,1}\xi_{2,0} & \zeta_{1,3} - \zeta_{1,1}\gamma_{2,0} \\ \zeta_{3,1} - \zeta_{1,1}\xi_{2,0} & \xi_{4,0} - \xi_{2,0}^2 & \zeta_{2,2} - \xi_{2,0}\gamma_{2,0} \\ \zeta_{1,3} - \zeta_{1,1}\gamma_{2,0} & \zeta_{2,2} - \xi_{2,0}\gamma_{2,0} & \gamma_{4,0} - \gamma_{2,0}^2 \end{pmatrix},$$

and

$$\nabla(\mathbb{E}(a), \mathbb{E}(b), \mathbb{E}(c)) = \left( \frac{1}{\sqrt{\xi_{2,0} \gamma_{2,0}}}, -\frac{\zeta_{1,1}}{2\xi_{2,0}^{3/2}\sqrt{\gamma_{2,0}}}, -\frac{\zeta_{1,1}}{2\gamma_{2,0}^{3/2}\sqrt{\xi_{2,0}}} \right).$$

Using Taylor expansion we have

$$\text{Var}(\hat{\rho}_{b_1, b_2, n}) = \nabla(\mathbb{E}(a), \mathbb{E}(b), \mathbb{E}(c))^T \text{Cov}(a, b, c) \nabla(\mathbb{E}(a), \mathbb{E}(b), \mathbb{E}(c)) + O\left(\frac{1}{k^2}\right).$$

The final result is derived by direct calculation and collecting terms:

$$\begin{aligned}\text{Var}(\hat{\rho}_{b_1, b_2, n}) &= \frac{1}{k} \left[ \frac{\zeta_{2,2} - \zeta_{1,1}^2}{\xi_{2,0} \gamma_{2,0}} - \frac{\zeta_{1,1}\zeta_{3,1} - \zeta_{1,1}^2 \xi_{2,0}}{\xi_{2,0}^2 \gamma_{2,0}} - \frac{\zeta_{1,1}\zeta_{1,3} - \zeta_{1,1}^2 \gamma_{2,0}}{\xi_{2,0} \gamma_{2,0}^2} \right. \\ &\quad \left. + \frac{\zeta_{1,1}^2 \zeta_{2,2} - \zeta_{1,1}^2 \xi_{2,0} \gamma_{2,0}}{2\xi_{2,0}^2 \gamma_{2,0}^2} + \frac{\zeta_{1,1}^2 \xi_{4,0} - \zeta_{1,1}^2 \xi_{2,0}^2}{4\xi_{2,0}^3 \gamma_{2,0}} + \frac{\zeta_{1,1}^2 \gamma_{4,0} - \zeta_{1,1}^2 \gamma_{2,0}^2}{4\xi_{2,0} \gamma_{2,0}^3} \right] + O\left(\frac{1}{k^2}\right).\end{aligned}$$

This completes the proof.  $\square$



## C Proofs of Section 5: Monotonicity

### C.1 Proof of Theorem 7

**Lemma C3.** Assume  $\begin{pmatrix} x \\ y \end{pmatrix} \sim N\left(\begin{pmatrix} 0 \\ 0 \end{pmatrix}, \begin{pmatrix} 1 & \rho \\ \rho & 1 \end{pmatrix}\right)$ . For  $0 \leq s < t$  and  $-1 \leq \rho \leq 1$ ,  $Pr(x \in [s, t], y \geq 0)$  is increasing in  $\rho$ ,  $Pr(x \in [s, t], y < 0)$  is decreasing in  $\rho$ .

*Proof.* We have

$$\begin{aligned} P_{s,t,+} &= Pr(x \in [s, t], y \geq 0) = \int_0^\infty \int_s^t \frac{1}{2\pi\sqrt{1-\rho^2}} e^{-\frac{x^2-2\rho xy+y^2}{2(1-\rho^2)}} dx dy \\ &= \int_0^\infty \frac{1}{2\pi\sqrt{1-\rho^2}} e^{-\frac{x^2}{2}} \int_s^t e^{-\frac{(y-\rho x)^2}{2(1-\rho^2)}} dy dx \\ &= \int_0^\infty \frac{1}{2\pi\sqrt{1-\rho^2}} e^{-\frac{x^2}{2}} \int_{\frac{s-\rho x}{\sqrt{1-\rho^2}}}^{\frac{t-\rho x}{\sqrt{1-\rho^2}}} e^{-\frac{u^2}{2}} \sqrt{1-\rho^2} du dx \\ &= \int_0^\infty \frac{1}{\sqrt{2\pi}} e^{-\frac{x^2}{2}} \left[ \Phi\left(\frac{t-\rho x}{\sqrt{1-\rho^2}}\right) - \Phi\left(\frac{s-\rho x}{\sqrt{1-\rho^2}}\right) \right] dx. \end{aligned}$$

It is easy to check that this integral meets the conditions of DCT. Hence, taking the derivative yields

$$\frac{\partial P_{s,t,+}}{\partial \rho} := \int_0^\infty \frac{1}{\sqrt{2\pi}} e^{-\frac{x^2}{2}} \left[ \phi\left(\frac{t-\rho x}{\sqrt{1-\rho^2}}\right) \frac{-x+t\rho}{(1-\rho^2)^{3/2}} - \phi\left(\frac{s-\rho x}{\sqrt{1-\rho^2}}\right) \frac{-x+s\rho}{(1-\rho^2)^{3/2}} \right] dx.$$

For the first term we have

$$\begin{aligned} \int_0^\infty \frac{1}{\sqrt{2\pi}} e^{-\frac{x^2}{2}} \phi\left(\frac{t-\rho x}{\sqrt{1-\rho^2}}\right) \frac{-x+t\rho}{(1-\rho^2)^{3/2}} dx &= \int_0^\infty \frac{1}{2\pi} e^{-\frac{(x-t\rho)^2}{2(1-\rho^2)}} e^{-\frac{t^2}{2}} \frac{-x+t\rho}{(1-\rho^2)^{3/2}} dx \\ &= \frac{1}{2\pi} \frac{1}{\sqrt{1-\rho^2}} e^{-\frac{t^2}{2}} e^{-\frac{(x-t\rho)^2}{2(1-\rho^2)}} \Big|_0^\infty \\ &= -\frac{1}{2\pi} \frac{1}{\sqrt{1-\rho^2}} e^{-\frac{t^2}{2(1-\rho^2)}}. \end{aligned} \tag{11}$$

Similarly we can compute

$$\int_0^\infty \frac{1}{\sqrt{2\pi}} e^{-\frac{x^2}{2}} \phi\left(\frac{s-\rho x}{\sqrt{1-\rho^2}}\right) \frac{-x+s\rho}{(1-\rho^2)^{3/2}} dx = -\frac{1}{2\pi} \frac{1}{\sqrt{1-\rho^2}} e^{-\frac{s^2}{2(1-\rho^2)}}. \tag{12}$$

Thus, we obtain

$$\begin{aligned} \frac{\partial P_{s,t,+}}{\partial \rho} &= \frac{1}{2\pi} \frac{1}{\sqrt{1-\rho^2}} e^{-\frac{s^2}{2(1-\rho^2)}} - \frac{1}{2\pi} \frac{1}{\sqrt{1-\rho^2}} e^{-\frac{t^2}{2(1-\rho^2)}} \\ &= \frac{1}{2\pi} \frac{1}{\sqrt{1-\rho^2}} (e^{-\frac{s^2}{2(1-\rho^2)}} - e^{-\frac{t^2}{2(1-\rho^2)}}) \\ &> 0, \end{aligned}$$

due to the fact that  $s < t$ . For  $P_{s,t,-} := Pr(x \in [s, t], y < 0)$ , we proceed with similar calculation, which will change the sign in (11) and (12) and eventually gives

$$\frac{\partial P_{s,t,-}}{\partial \rho} = \frac{1}{2\pi} \frac{1}{\sqrt{1-\rho^2}} (e^{-\frac{t^2}{2(1-\rho^2)}} - e^{-\frac{s^2}{2(1-\rho^2)}}) < 0.$$

The proof is complete.  $\square$

## C.2 Proof of Lemma 1

We prove a more detailed version of Lemma 1.

**Lemma C4.** Assume  $Q_{b_1}$  is a  $M$ -bit symmetric quantizer in the sense that it divides the positive axis into  $M$  intervals with cut point  $t_0 = 0 < t_1 < \dots < t_{M-1}$ . The reconstruction levels are give by  $Q_{b_1}(x) = \mu_i > 0$ ,  $x \in [t_{i-1}, t_i]$  and  $Q_{b_1}(x) = -\mu_i$ ,  $x \in [-t_i, -t_{i-1}]$ ,  $i = 1, \dots, M$ .  $Q_{b_2}$  is a 1-bit quantizer such that  $Q_{b_2}(y) = \nu > 0$  when  $y \geq 0$  and  $Q_{b_2}(y) = -\nu$  when  $y < 0$ . Then  $E[Q_{b_1}(x)Q_{b_2}(y)]$  is strictly increasing in  $\rho$  on  $[-1, 1]$ .

*Proof.* Denote  $P_{s,t,+} = Pr(x \in [s, t], y \geq 0)$  and  $P_{s,t,-} = Pr(x \in [s, t], y < 0)$ . We write explicitly

$$\begin{aligned} \mathbb{E}[Q_{b_1}(x)Q_{b_2}(y)] &= \nu \sum_{i=1}^M \mu_i Pr_{t_{i-1}, t_i, +} - \nu \sum_{i=1}^M \mu_i Pr_{t_{i-1}, t_i, -} \\ &\quad - \nu \sum_{i=1}^M \mu_i Pr_{-t_i, -t_{i-1}, +} + \nu \sum_{i=1}^M \mu_i Pr_{-t_i, -t_{i-1}, -} \\ &= 2\nu \sum_{i=1}^M \mu_i (Pr_{t_{i-1}, t_i, +} - Pr_{t_{i-1}, t_i, -}), \end{aligned}$$

due to the symmetry of bivariate normal density. Since  $\nu > 0$  and  $\mu_i > 0$ ,  $i = 1, \dots, M$ , applying Lemma C3 we prove the desired result.  $\square$

## C.3 Proof of Lemma 2

In the following we prove a detailed version of Lemma 2.

**Lemma C5.** Consider two 2-bit symmetric quantizers  $Q_{b_1}$  and  $Q_{b_2}$ .  $Q_{b_1}$  has cut point at  $(-t_1, 0, t_1)$  with distinct quantizing values  $(-\mu_2, -\mu_1, \mu_1, \mu_2)$ ,  $0 < \mu_1 < \mu_2$  on the 4 intervals separated by the cut points. Similarly,  $Q_{b_2}$  has cut points  $(-t_2, 0, t_2)$  and distinct codes  $(-\xi_2, -\xi_1, \xi_1, \xi_2)$ ,  $0 < \xi_1 < \xi_2$ . Assume that both quantizers to be increasing, namely,  $\mu_1 < \mu_2$ ,  $\xi_1 < \xi_2$ . Then  $E[Q_{b_1}(x)Q_{b_2}(y)]$  is strictly increasing in  $\rho$  on  $[-1, 1]$ .

*Proof.* The expectations is computed as

$$\mathbb{E}[Q_{b_1}(x)Q_{b_2}(y)] = 2\mu_1\xi_1(P_{11} - p_{11}) + 2\mu_1\xi_2(P_{12} - p_{12}) + 2\mu_2\xi_1(P_{21} - p_{21}) + 2\mu_2\xi_2(P_{22} - p_{22}), \quad (13)$$

where

$$\begin{aligned} P_{11} &= Pr(x \in [0, t_1], y \in [0, t_2]), P_{12} = Pr(x \in [0, t_1], y \in [t_2, +\infty]), \\ P_{21} &= Pr(x \in [t_1, +\infty], y \in [0, t_2]), P_{22} = Pr(x \in [t_1, +\infty], y \in [t_2, +\infty]), \\ p_{11} &= Pr(x \in [0, t_1], y \in [-t_2, 0]), p_{12} = Pr(x \in [0, t_1], y \in [-\infty, -t_2]), \\ p_{21} &= Pr(x \in [t_1, +\infty], y \in [-t_2, 0]), p_{22} = Pr(x \in [t_1, +\infty], y \in [-\infty, -t_2]). \end{aligned}$$

We compute the derivative with respect to  $\rho$  for each probability using the procedure in proving lemma.

$$\begin{aligned}
\frac{\partial P_{11}}{\partial \rho} &= \frac{1}{2\pi} \frac{1}{\sqrt{1-\rho^2}} [e^{-\frac{t_1^2+t_2^2-2\rho t_1 t_2}{2(1-\rho^2)}} - e^{-\frac{t_1^2}{2(1-\rho^2)}} - e^{-\frac{t_2^2}{2(1-\rho^2)}} + 1] \\
\frac{\partial P_{12}}{\partial \rho} &= \frac{1}{2\pi} \frac{1}{\sqrt{1-\rho^2}} [-e^{-\frac{t_1^2+t_2^2-2\rho t_1 t_2}{2(1-\rho^2)}} + e^{-\frac{t_2^2}{2(1-\rho^2)}}] \\
\frac{\partial P_{21}}{\partial \rho} &= \frac{1}{2\pi} \frac{1}{\sqrt{1-\rho^2}} [-e^{-\frac{t_1^2+t_2^2-2\rho t_1 t_2}{2(1-\rho^2)}} + e^{-\frac{t_1^2}{2(1-\rho^2)}}] \\
\frac{\partial P_{22}}{\partial \rho} &= \frac{1}{2\pi} \frac{1}{\sqrt{1-\rho^2}} e^{-\frac{t_1^2+t_2^2-2\rho t_1 t_2}{2(1-\rho^2)}} \\
\frac{\partial p_{11}}{\partial \rho} &= \frac{1}{2\pi} \frac{1}{\sqrt{1-\rho^2}} [-e^{-\frac{t_1^2+t_2^2+2\rho t_1 t_2}{2(1-\rho^2)}} + e^{-\frac{t_1^2}{2(1-\rho^2)}} + e^{-\frac{t_2^2}{2(1-\rho^2)}} - 1] \\
\frac{\partial p_{12}}{\partial \rho} &= \frac{1}{2\pi} \frac{1}{\sqrt{1-\rho^2}} [e^{-\frac{t_1^2+t_2^2+2\rho t_1 t_2}{2(1-\rho^2)}} - e^{-\frac{t_2^2}{2(1-\rho^2)}}] \\
\frac{\partial p_{21}}{\partial \rho} &= \frac{1}{2\pi} \frac{1}{\sqrt{1-\rho^2}} [e^{-\frac{t_1^2+t_2^2+2\rho t_1 t_2}{2(1-\rho^2)}} - e^{-\frac{t_1^2}{2(1-\rho^2)}}] \\
\frac{\partial p_{22}}{\partial \rho} &= -\frac{1}{2\pi} \frac{1}{\sqrt{1-\rho^2}} e^{-\frac{t_1^2+t_2^2+2\rho t_1 t_2}{2(1-\rho^2)}}.
\end{aligned}$$

Now, taking the derivative of (13) and collecting terms yields

$$\frac{\partial \mathbb{E}[Q_{b_1}(x)Q_{b_2}(y)]}{\partial \rho} = \frac{1}{\pi} \frac{1}{\sqrt{1-\rho^2}} [\mu_1 \xi_1 (A+2-2C_1-2C_2) + \mu_1 \xi_2 (2C_2-A) + \mu_2 \xi_1 (2C_1-A) + \mu_2 \xi_2 A],$$

where  $A = e^{-\frac{t_1^2+t_2^2-2\rho t_1 t_2}{2(1-\rho^2)}} + e^{-\frac{t_1^2+t_2^2+2\rho t_1 t_2}{2(1-\rho^2)}}$ ,  $C_1 = e^{-\frac{t_1^2}{2(1-\rho^2)}}$ ,  $C_2 = e^{-\frac{t_2^2}{2(1-\rho^2)}}$ . Rearranging terms, we obtain

$$\begin{aligned}
\frac{\partial \mathbb{E}[Q_{b_1}(x)Q_{b_2}(y)]}{\partial \rho} &\propto A(\mu_1 \xi_1 - \mu_1 \xi_2 - \mu_2 \xi_1 + \mu_2 \xi_2) + (2 - 2C_1 - 2C_2)\mu_1 \xi_1 + 2C_2\mu_1 \xi_2 + 2C_1\mu_2 \xi_1 \\
&= A(\mu_1 \xi_1 - \mu_1 \xi_2 - \mu_2 \xi_1 + \mu_2 \xi_2) + 2\mu_1 \xi_1 + 2C_1 \xi_1 (\mu_2 - \mu_1) + 2C_2 \mu_1 (\xi_2 - \xi_1) \\
&> 0.
\end{aligned}$$

The last inequality holds due to  $0 < \mu_1 < \mu_2$ ,  $0 < \xi_1 < \xi_2$ .  $\square$

Theorem C5 requires that both quantizers be “stair-shaped” (*i.e.* increasing) functions. Next, we extend the analysis to the general case based on this result.

#### C.4 Proof of Lemma 3

*Proof.* We show how to construct such decomposition. By symmetry, it suffices to consider the positive part. Suppose the cut point of  $Q_b$  is  $(t_1 = 0, t_2, \dots, t_k)$  with values  $(\mu_1, \dots, \mu_k)$ , all greater than 0 and in an increasing order. Now choose a number  $0 < \xi_1 < \min(\mu_1, \mu_k - \mu_{k-1})$ , and set the values of  $Q_{b-1}$  as  $(\mu_1 - \xi_1, \mu_2 - \xi_1, \dots, \mu_{k-1} - \xi_1)$ , with cut points  $(t_1 = 0, t_2, \dots, t_{k-1})$ . Let  $Q_{b_2}$  be cut at  $t_k$ , with values  $(\xi_1, \mu_k - \mu_{k-1} + \xi_1)$ . It is easy to check that this procedure is valid in any case. This proves the lemma.  $\square$

## References

- [1] Theodore W. Anderson. *An Introduction to Multivariate Statistical Analysis*. John Wiley & Sons, third edition, 2003.
